# Supplementary material for: Population Pharmacokinetics of an Anti-PD-L1 Antibody, Durvalumab in Patients with Hematologic Malignancies
Source: Springer Nature journal article supplement (doi:10.1007/s40262-019-00804-x), 2019-07-22
Supplement: MOESM1 [file 16970350]

Electronic Supplementary Material

*Clinical Pharmacokinetics*

**Population Pharmacokinetics of an Anti-PD-L1 Antibody,  
Durvalumab in Patients with Hematologic Malignancies**

Ken Ogasawara, Kathryn Newhall, Stephen E. Maxwell, Justine Dell'Aringa, Vitalina Komashko, Nurgul Kilavuz, Richard Delarue, Myron Czuczman, Lars Sternas, Shelonitda Rose, C. L. Beach, Steven Novick, Simon Zhou, Maria Palmisano, Yan Li\*

**\* Corresponding author:**

Yan Li

Translational Development and Clinical Pharmacology, Celgene Corporation, 556 Morris Ave,  
Summit, NJ 07901, USA

Email: [yali@celgene.com](mailto:yali@celgene.com)

**Supplementary Table 1** Summary of covariate model building steps from base to final population-pharmacokinetic model of durvalumab

| <b>Order</b>                     | <b>Covariate</b> | <b>Parameter</b> | <b>ΔOFV</b> |
|----------------------------------|------------------|------------------|-------------|
| <b>Forward inclusion step</b>    |                  |                  |             |
| 1                                | Albumin          | CL               | -290.57     |
| 2                                | IgG              | CL               | -159.38     |
| 3                                | Weight           | CL               | -63.40      |
| 4                                | Sex              | Vc               | -59.72      |
| 5                                | Albumin          | Vc               | -27.74      |
| 6                                | Sex              | CL               | -20.27      |
| 7                                | MDS/AML          | CL               | -23.30      |
| 8                                | MM               | Vc               | -20.76      |
| 9                                | Weight           | Vc               | -22.13      |
| 10                               | sPD-L1           | CL               | -16.63      |
| 11                               | LDH              | CL               | -15.44      |
| <b>Backward elimination step</b> |                  |                  |             |
| -                                | Albumin          | CL               | +238.72     |
| -                                | IgG              | CL               | +153.48     |
| -                                | Weight           | CL               | +32.02      |
| -                                | Sex              | Vc               | +30.08      |
| -                                | Albumin          | Vc               | +34.89      |
| -                                | Sex              | CL               | +28.32      |
| -                                | MDS/AML          | CL               | +32.10      |
| -                                | MM               | Vc               | +24.32      |
| -                                | Weight           | Vc               | +22.16      |
| -                                | sPD-L1           | CL               | +18.28      |
| -                                | LDH              | CL               | +15.44      |

*AML* acute myeloid leukemia, *CL* clearance, *IgG* immunoglobulin G, *LDH* lactate dehydrogenase, *MDS* myelodysplastic syndromes, *MM* multiple myeloma, *OFV* objective function value, *sPD-L1* soluble programmed cell death ligand 1, *Vc* volume of distribution of central compartment

## Supplementary Figure 1

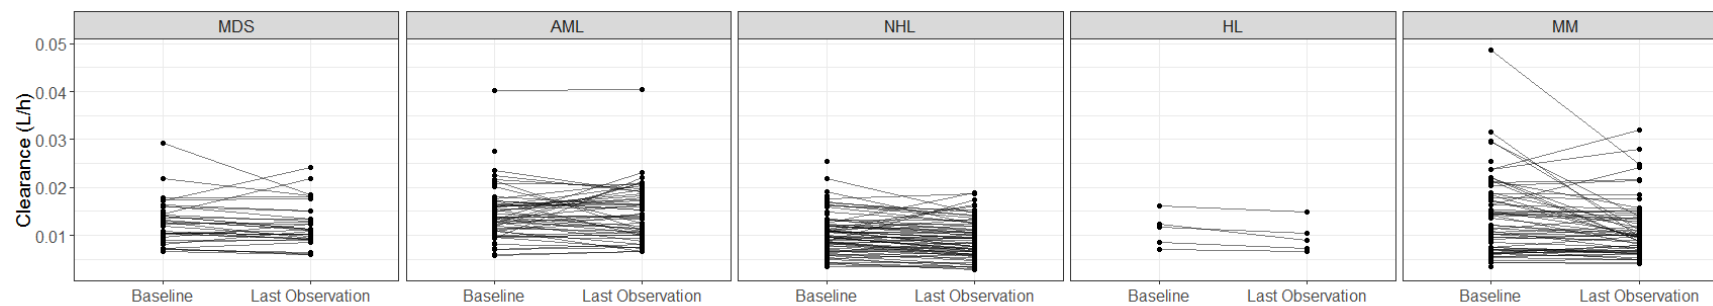

**Supplementary Fig. 1** Comparison of durvalumab clearance (CL) at baseline and last observation by type of hematologic malignancies. Last observations that occurred within cycle 1 were excluded from the plot.

*AML* acute myeloid leukemia, *HL* Hodgkin lymphoma, *MDS* myelodysplastic syndromes, *MM* multiple myeloma, *NHL* non-Hodgkin lymphoma

## Supplementary Figure 2

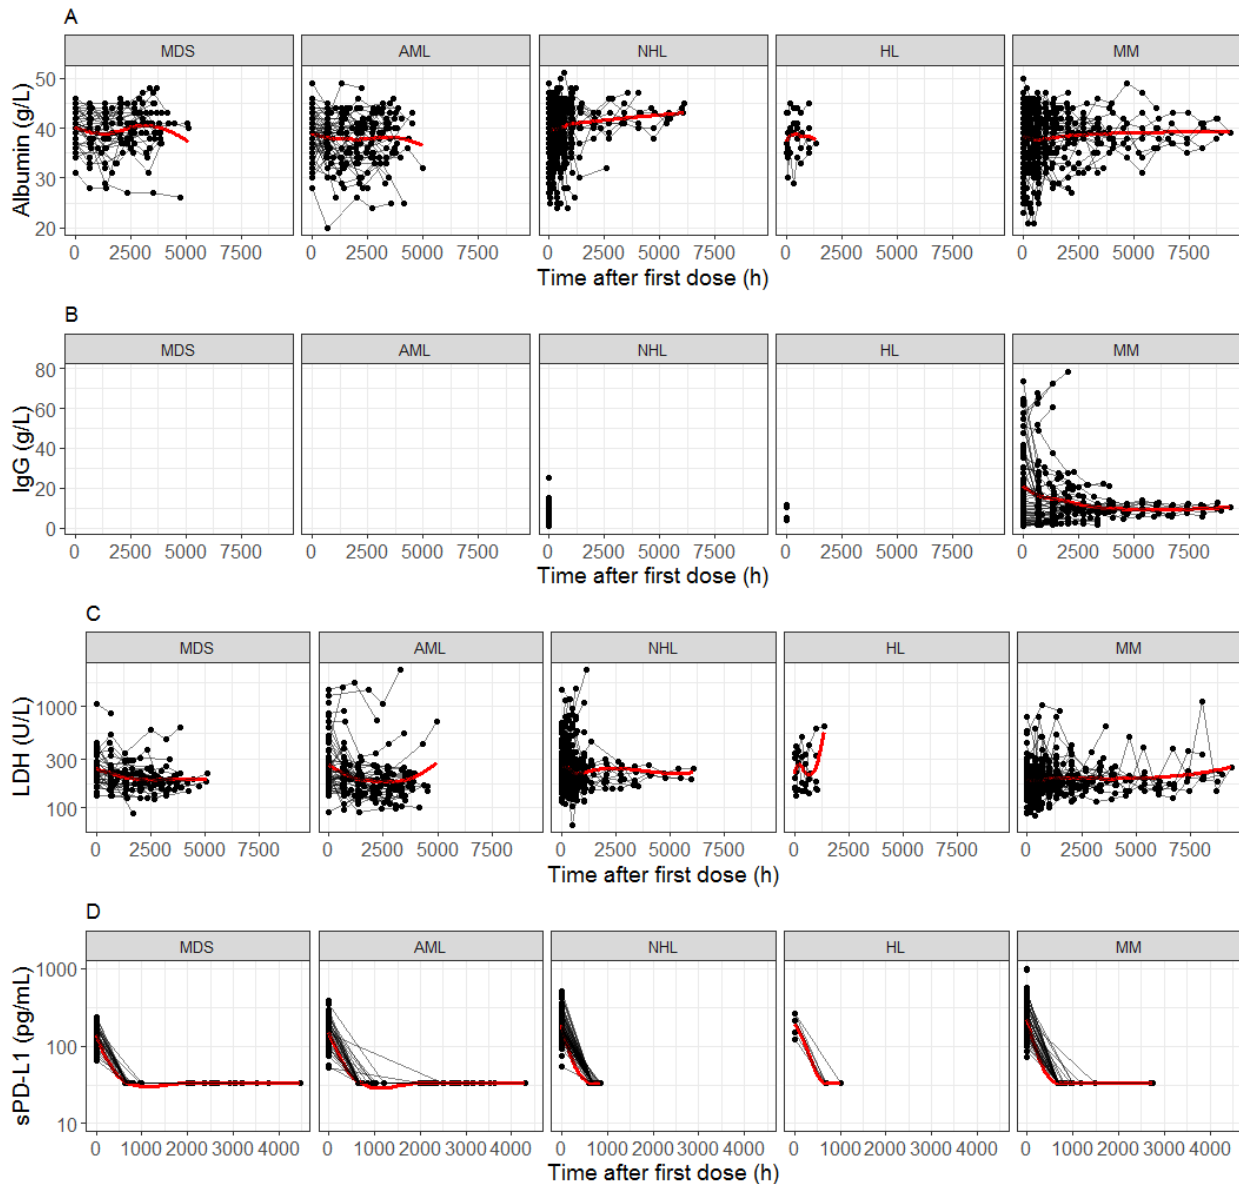

**Supplementary Fig. 2** Changes in albumin (A), immunoglobulin G [IgG] (B), lactate dehydrogenase [LDH] (C), and soluble programmed cell death ligand 1 [sPD-L1] (D) over time by type of hematologic malignancies. Change in IgG over time was available only from patients with multiple myeloma (MM). Soluble programmed cell death ligand 1 levels below the limit of detection (LOD, 67.1 pg/mL) was imputed as LOD/2 (33.55 pg/mL). The *red line* represents the locally weighted scatterplot smoothing line.

*AML* acute myeloid leukemia, *HL* Hodgkin lymphoma, *MDS* myelodysplastic syndromes, *NHL* non-Hodgkin lymphoma

### Supplementary Figure 3

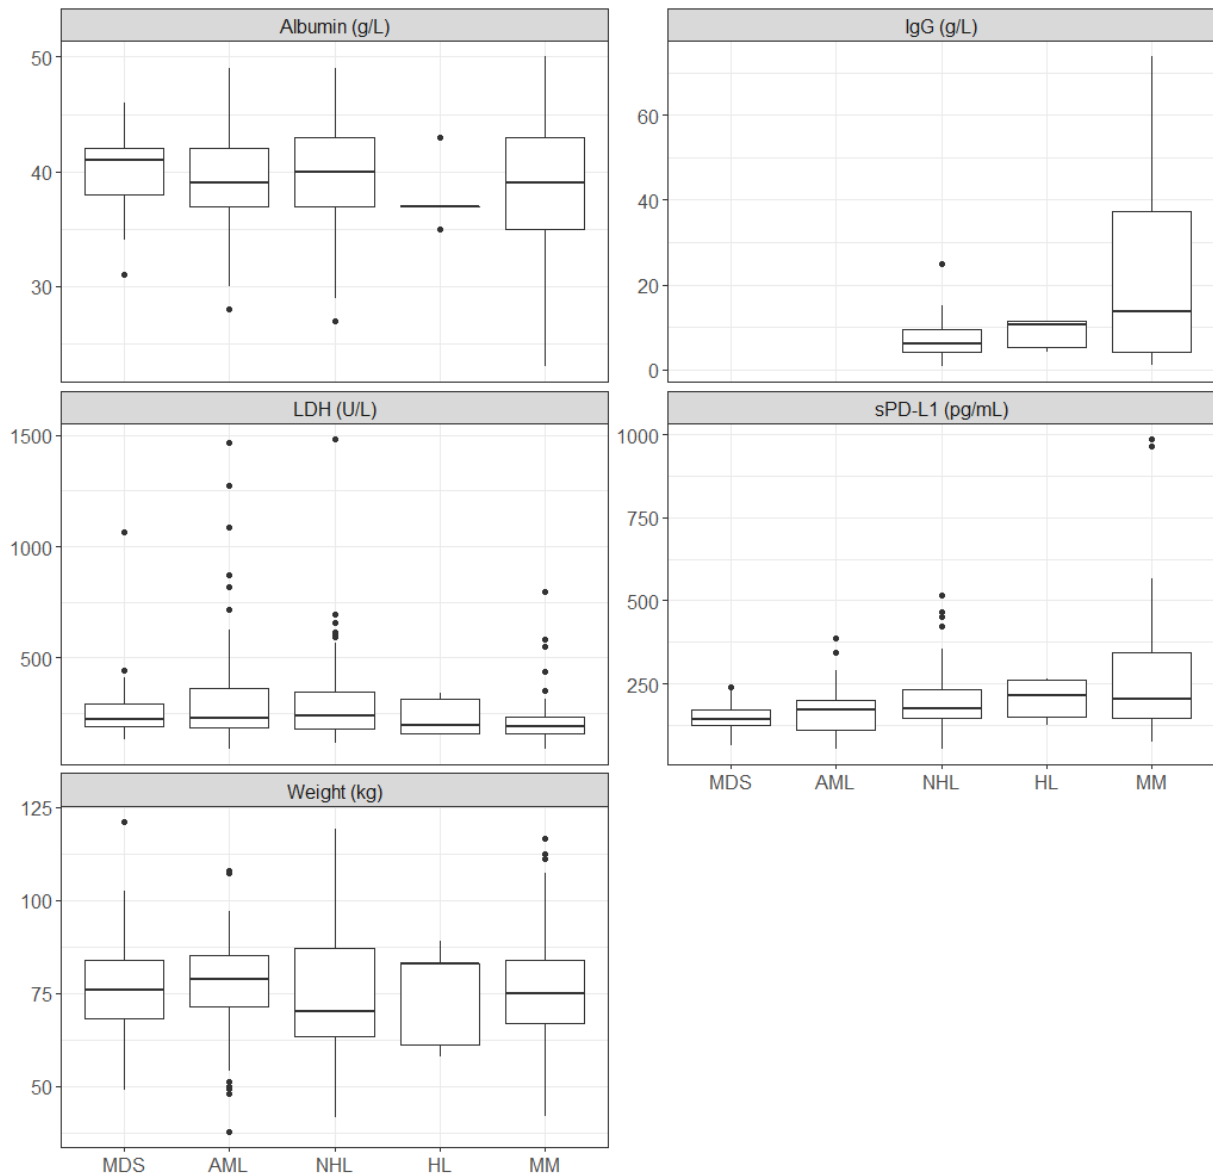

**Supplementary Fig. 3** Distribution of significant covariates at baseline by type of hematologic malignancies.

*AML* acute myeloid leukemia, *HL* Hodgkin lymphoma, *IgG* immunoglobulin G, *LDH* lactate dehydrogenase, *MDS* myelodysplastic syndromes, *MM* multiple myeloma, *NHL* non-Hodgkin lymphoma, *sPD-L1* soluble programmed cell death ligand 1

**Supplementary Figure 4**

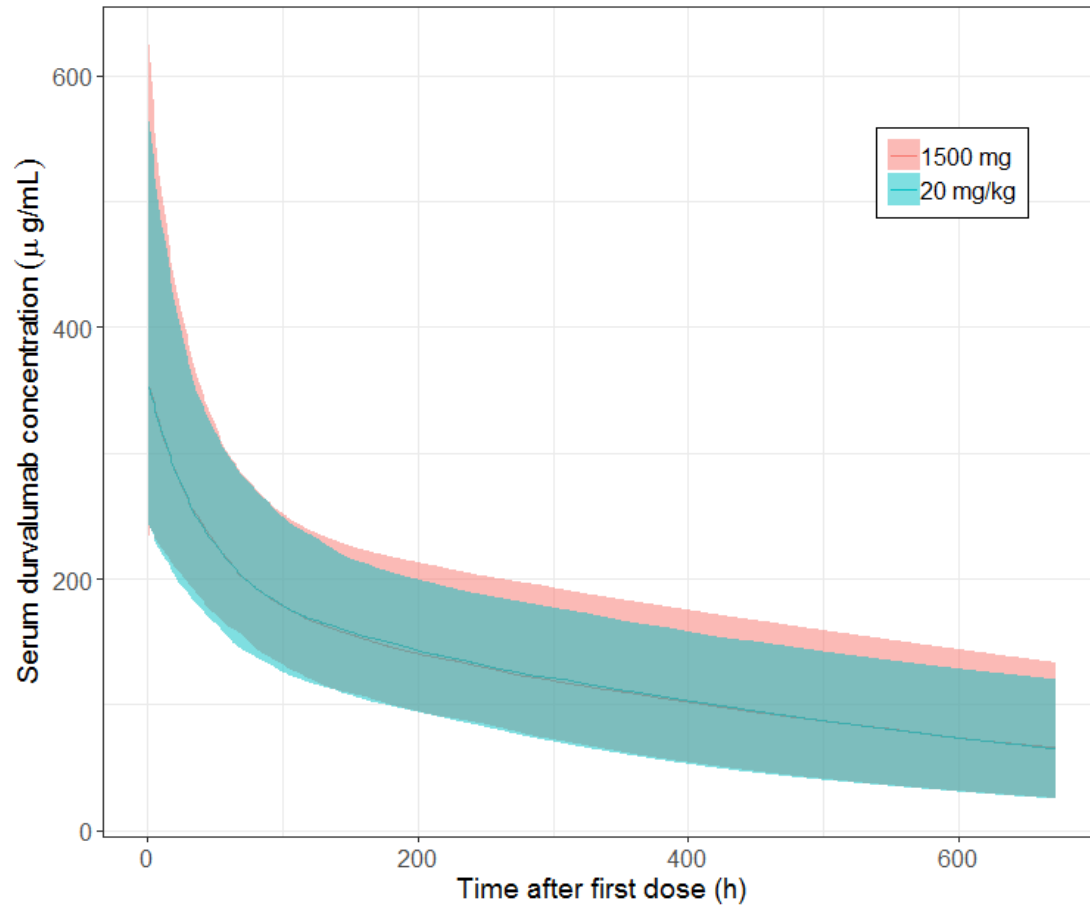

**Supplementary Fig. 4** Simulated serum durvalumab concentration–time profile at cycle 1 following a fixed dose (1500 mg) and a body weight-based dose (20 mg/kg). *Lines and shaded areas* represent median and 90% prediction intervals of the simulated durvalumab concentration obtained from 267 patients in the population-pharmacokinetic dataset
